# Supplementary material for: Plasma sphingolipids, lung function and COPD: the Cardiovascular Health Study
Source: PubMed Central journal article supplement — ERJ Open Res. 2023 Apr 3;9(2):00346-2022. doi: 10.1183/23120541.00346-2022 (PMC10068528; doi:10.1183/23120541.00346-2022), 2023-04-03

## SUPPLEMENTAL MATERIALS

### Supplemental Tables

**Table S1. Sphingolipid absolute concentrations with standard deviations**

|           | Mean | SD    | Minimum | Maximum |
|-----------|------|-------|---------|---------|
| Cer-14    | 0.01 | 0.002 | 0.001   | 0.013   |
| Cer-16    | 0.26 | 0.06  | 0.11    | 0.91    |
| Cer-18    | 0.18 | 0.07  | 0.04    | 0.88    |
| Cer-20    | 0.09 | 0.03  | 0.01    | 0.25    |
| Cer-22    | 0.62 | 0.19  | 0.18    | 1.90    |
| Cer-24    | 4.5  | 1.1   | 1.5     | 10.0    |
| SM-14     | 36   | 11    | 6       | 100     |
| SM-16     | 125  | 19    | 49      | 227     |
| SM-18     | 38   | 10    | 13      | 129     |
| SM-20     | 18   | 4     | 6       | 36      |
| SM-22     | 27   | 6     | 10      | 63      |
| SM-24     | 14   | 3     | 5       | 33      |
| HexCer-16 | 0.19 | 0.07  | 0.05    | 0.69    |
| HexCer-22 | 0.19 | 0.05  | 0.07    | 0.52    |
| HexCer-24 | 0.17 | 0.05  | 0.05    | 0.50    |
| LacCer-16 | 0.75 | 0.23  | 0.20    | 2.67    |
| LacCer-24 | 0.09 | 0.03  | 0.02    | 0.45    |

All sphingolipid concentrations are given in  $\mu\text{M}$  units.

**Table S2. Baseline characteristics (ceramides)**

|                                | Mean (SD) | Cer-14 |            | Cer-16 |            | Cer-18 |            | Cer-20 |            | Cer-22 |            | Cer-24 |          |
|--------------------------------|-----------|--------|------------|--------|------------|--------|------------|--------|------------|--------|------------|--------|----------|
|                                |           | Trend  | Q1, Q4     | Trend  | Q1, Q4   |
| Age, years                     | 77 (5)    |        | 76, 77 +   |        | 76, 77     |        | 76, 77     |        | 76, 77 -   |        | 77, 76 -   |        | 77, 76   |
| Sex, % male                    | 41%       | -      | 43, 36 -   | -      | 43, 36 -   | -      | 52, 31 -   | -      | 49, 35     | -      | 44, 39     | -      | 39, 42   |
| Race, % White                  | 84%       |        | 82, 85 +   |        | 81, 86 -   |        | 93, 73 -   |        | 91, 78     |        | 85, 84     |        | 84, 85   |
| Height, cm                     | 165 (9)   | -      | 165, 164 - | -      | 166, 164 - | -      | 167, 163 - | -      | 167, 163 - | -      | 166, 164   | -      | 165, 165 |
| Weight, lbs                    | 167 (81)  |        | 171, 161   |        | 170, 165   |        | 163, 173   |        | 167, 169   |        | 165, 166   |        | 166, 167 |
| HDL, mg/dL                     | 53 (14)   | +      | 51, 57 +   | -      | 56, 51 -   | -      | 55, 51 -   | -      | 55, 51 -   | -      | 57, 49 -   | -      | 56, 50   |
| LDL, mg/dL                     | 128 (33)  | +      | 120, 137 + | +      | 115, 139 + | +      | 119, 137 + | +      | 116, 137 + | +      | 112, 139 + | +      | 113, 141 |
| Alcohol consumption, drinks/wk | 2 (5)     |        | 2, 2       |        | 3, 2 -     |        | 3, 1 -     |        | 3, 1 -     |        | 3, 1       |        | 2, 2     |
| Prevalent diabetes, %          | 19%       | -      | 23, 15 +   | +      | 16, 24 +   | +      | 12, 27 +   | +      | 14, 27 +   | +      | 12, 28 +   | +      | 14, 24   |
| Never smoker, %                | 46%       |        | 44, 47     |        | 45, 45     |        | 44, 48     |        | 46, 46     |        | 47, 45 -   |        | 51, 44   |
| Past smoker, %                 | 44%       |        | 46, 42     |        | 46, 44 -   |        | 47, 41     |        | 45, 42     |        | 45, 44     |        | 41, 44   |
| Current smoker, %              | 9%        |        | 8, 9 +     | +      | 7, 10      |        | 8, 11      |        | 7, 11      |        | 6, 10 +    | +      | 7, 10    |

+ indicates a significant positive trend across quartiles of sphingolipid levels. - indicates a significant negative trend across quartiles of sphingolipid levels. A blue line indicates a statistically significant positive trend in univariate analyses. A red line indicates a statistically significant negative trend in univariate analyses. A grey line indicates no significant trend.

**Table S3. Baseline characteristics (sphingomyelins)**

|                                | Mean (SD) | SM-14 |            | SM-16 |            | SM-18 |            | SM-20 |            | SM-22 |            | SM-24 |          |
|--------------------------------|-----------|-------|------------|-------|------------|-------|------------|-------|------------|-------|------------|-------|----------|
|                                |           | Trend | Q1, Q4     | Trend | Q1, Q4   |
| Age, years                     | 77 (5)    |       | 77, 76     |       | 76, 77 -   |       | 77, 76 -   |       | 78, 75 -   |       | 78, 75 -   |       | 78, 75   |
| Sex, % male                    | 41%       | -     | 58, 29 -   | -     | 52, 31 -   | -     | 59, 24 -   | -     | 56, 28 -   | -     | 50, 30 -   | -     | 43, 38   |
| Race, % White                  | 84%       | +     | 75, 91 +   |       | 91, 72 -   |       | 95, 63 -   |       | 86, 80 -   |       | 89, 76 -   |       | 87, 79   |
| Height, cm                     | 165 (9)   | -     | 167, 163 - | -     | 167, 163 - | -     | 167, 162 - | -     | 167, 163 - | -     | 166, 164   | -     | 165, 165 |
| Weight, lbs                    | 167 (81)  |       | 172, 161   |       | 174, 163   |       | 169, 170   |       | 171, 165   |       | 168, 165   |       | 170, 165 |
| HDL, mg/dL                     | 53 (14)   | +     | 49, 57 +   | +     | 48, 59 +   | +     | 50, 56 +   | +     | 50, 57 +   | +     | 51, 55 +   | +     | 51, 56   |
| LDL, mg/dL                     | 128 (33)  | +     | 113, 143 + | +     | 111, 143 + | +     | 114, 143 + | +     | 109, 144 + | +     | 109, 145 + | +     | 112, 143 |
| Alcohol consumption, drinks/wk | 2 (5)     |       | 2, 3       |       | 2, 2       |       | 2, 2       |       | 2, 2 -     |       | 2, 2 +     |       | 2, 2     |
| Prevalent diabetes, %          | 19%       | -     | 23, 17 -   | -     | 24, 15     |       | 18, 20     |       | 21, 17     |       | 20, 19     |       | 22, 18   |
| Never smoker, %                | 46%       |       | 45, 47     |       | 43, 47 +   |       | 43, 49     |       | 45, 47     |       | 47, 47     |       | 49, 44   |
| Past smoker, %                 | 44%       |       | 44, 43 -   | -     | 49, 40 -   | -     | 47, 40     |       | 45, 42     |       | 44, 42     |       | 43, 43   |
| Current smoker, %              | 9%        |       | 10, 9      |       | 8, 11      |       | 9, 10      |       | 9, 9       |       | 7, 10 +    | +     | 7, 11    |

+ indicates a significant positive trend across quartiles of sphingolipid levels. - indicates a significant negative trend across quartiles of sphingolipid levels. A blue line indicates a statistically significant positive trend in univariate analyses. A red line indicates a statistically significant negative trend in univariate analyses. A grey line indicates no significant trend.

**Table S4. Baseline characteristics (other sphingolipids)**

|                                | Mean (SD) | GluCer-16 |            | GluCer-22 |            | GluCer-24 |            | LacCer-16 |            | LacCer-24 |          |
|--------------------------------|-----------|-----------|------------|-----------|------------|-----------|------------|-----------|------------|-----------|----------|
|                                |           | Trend     | Q1, Q4     | Trend     | Q1, Q4   |
| Age, years                     | 77 (5)    | +         | 76, 77     |           | 76, 77     |           | 76, 77 +   |           | 76, 77     |           | 77, 76   |
| Sex, % male                    | 41%       | -         | 46, 38 -   | +         | 39, 47 +   | +         | 34, 48     |           | 43, 39     |           | 39, 39   |
| Race, % White                  | 84%       | -         | 96, 68 -   | -         | 88, 78 -   | -         | 86, 79 -   | -         | 91, 74 +   | +         | 81, 86   |
| Height, cm                     | 165 (9)   | -         | 166, 164 + | +         | 164, 166 + | +         | 164, 166   |           | 165, 165   |           | 165, 165 |
| Weight, lbs                    | 167 (81)  |           | 162, 171   |           | 168, 166   |           | 170, 169   |           | 165, 169   |           | 171, 162 |
| HDL, mg/dL                     | 53 (14)   | +         | 52, 55     |           | 52, 53 +   |           | 52, 54 +   |           | 52, 55 +   |           | 50, 56   |
| LDL, mg/dL                     | 128 (33)  | +         | 122, 136 + | +         | 118, 137 + | +         | 119, 136 + | +         | 121, 135 + | +         | 120, 134 |
| Alcohol consumption, drinks/wk | 2 (5)     |           | 2, 2       |           | 2, 2 +     |           | 2, 2 -     |           | 3, 2       |           | 2, 2     |
| Prevalent diabetes, %          | 19%       |           | 19, 18     |           | 21, 16 -   | -         | 22, 16     |           | 20, 17     |           | 20, 19   |
| Never smoker, %                | 46%       |           | 46, 47     |           | 48, 43     |           | 48, 42     |           | 45, 49     |           | 47, 46   |
| Past smoker, %                 | 44%       |           | 45, 41     |           | 44, 45     |           | 43, 45     |           | 46, 41     |           | 44, 43   |
| Current smoker, %              | 9%        |           | 8, 11      |           | 8, 11 +    | +         | 8, 11      |           | 8, 9       |           | 9, 10    |

+ indicates a significant positive trend across quartiles of sphingolipid levels. - indicates a significant negative trend across quartiles of sphingolipid levels. A blue line indicates a statistically significant positive trend in univariate analyses. A red line indicates a statistically significant negative trend in univariate analyses. A grey line indicates no significant trend.

**Table S5. Sphingolipid association with FEV<sub>1</sub>**

|           | FEV <sub>1</sub><br>Difference | Lower 95% | Upper 95% | P-value |
|-----------|--------------------------------|-----------|-----------|---------|
| Cer-14    | -0.042                         | -0.088    | 0.004     | 0.076   |
| Cer-16    | -0.071                         | -0.130    | -0.012    | 0.018   |
| Cer-18    | -0.064                         | -0.098    | -0.029    | <0.001  |
| Cer-20    | -0.037                         | -0.078    | 0.004     | 0.074   |
| Cer-22    | -0.028                         | -0.076    | 0.019     | 0.245   |
| Cer-24    | -0.001                         | -0.058    | 0.057     | 0.986   |
| SM-14     | 0.004                          | -0.047    | 0.054     | 0.886   |
| SM-16     | -0.138                         | -0.235    | -0.041    | 0.006   |
| SM-18     | -0.094                         | -0.153    | -0.035    | 0.002   |
| SM-20     | 0.033                          | -0.039    | 0.106     | 0.370   |
| SM-22     | -0.050                         | -0.118    | 0.017     | 0.144   |
| SM-24     | -0.033                         | -0.092    | 0.025     | 0.266   |
| HexCer-16 | -0.007                         | -0.045    | 0.031     | 0.715   |
| HexCer-22 | 0.004                          | -0.043    | 0.051     | 0.862   |
| HexCer-24 | 0.007                          | -0.042    | 0.055     | 0.793   |
| LacCer-16 | 0.009                          | -0.033    | 0.052     | 0.664   |
| LacCer-24 | -0.019                         | -0.059    | 0.022     | 0.370   |

Association of two-fold higher sphingolipid levels with FEV<sub>1</sub> (in liters). Analyses adjusted for age, race, sex, clinic site, height and weight, LDL and HDL cholesterol, weekly alcohol intake, diabetic status, smoker status, and pack-years smoked.

**Table S6. Sphingolipid association with COPD**

|           | Odds Ratio | Lower 95% | Upper 95% | P-value |
|-----------|------------|-----------|-----------|---------|
| Cer-14    | 1.447      | 1.039     | 2.014     | 0.029   |
| Cer-16    | 1.300      | 0.881     | 1.918     | 0.187   |
| Cer-18    | 1.294      | 1.025     | 1.632     | 0.030   |
| Cer-20    | 1.207      | 0.923     | 1.578     | 0.169   |
| Cer-22    | 1.226      | 0.905     | 1.661     | 0.188   |
| Cer-24    | 1.439      | 0.996     | 2.077     | 0.052   |
| SM-14     | 1.497      | 1.068     | 2.098     | 0.019   |
| SM-16     | 2.054      | 1.069     | 3.949     | 0.031   |
| SM-18     | 1.731      | 1.151     | 2.602     | 0.008   |
| SM-20     | 1.039      | 0.644     | 1.677     | 0.875   |
| SM-22     | 1.152      | 0.740     | 1.794     | 0.531   |
| SM-24     | 1.159      | 0.784     | 1.715     | 0.459   |
| HexCer-16 | 1.117      | 0.867     | 1.440     | 0.393   |
| HexCer-22 | 1.167      | 0.859     | 1.587     | 0.324   |
| HexCer-24 | 1.327      | 0.959     | 1.836     | 0.088   |
| LacCer-16 | 0.953      | 0.708     | 1.282     | 0.751   |
| LacCer-24 | 0.908      | 0.685     | 1.204     | 0.504   |

Association of two-fold higher sphingolipid levels with odds of COPD. Analyses adjusted for age, race, sex, clinic site, height and weight, LDL and HDL cholesterol, weekly alcohol intake, diabetic status, smoker status, and pack-years smoked.

**Table S7. Cer-18 and SM-18 co-adjusted model: FEV<sub>1</sub>**

|        | Association with FEV <sub>1</sub> |           |           |         | Co-adjusted association with FEV <sub>1</sub> |           |           |         |
|--------|-----------------------------------|-----------|-----------|---------|-----------------------------------------------|-----------|-----------|---------|
|        | Beta                              | Lower 95% | Upper 95% | P-value | Beta                                          | Lower 95% | Upper 95% | P-value |
| Cer-18 | -0.061                            | -0.096    | -0.026    | 0.001   | -0.046                                        | -0.093    | 0.002     | 0.059   |
| SM-18  | -0.092                            | -0.151    | -0.033    | 0.002   | -0.036                                        | -0.117    | 0.045     | 0.383   |

Panel on the left shows individual associations of Cer-18 and SM-18 with FEV<sub>1</sub> levels adjusted for age, race, sex, clinic site, height and weight, LDL and HDL cholesterol, weekly alcohol intake, diabetic status, smoker status, and pack-years smoked. Panel on the right shows association of Cer-18 and SM-18 with FEV<sub>1</sub> levels when both sphingolipids are included in the same model.

**Table S8. Interaction of select sphingolipids with smoking, age, race, and sex for association with FEV<sub>1</sub>**

|        | Interaction with smoking (former vs never), P= | Interaction with smoking (current vs never), P= | Interaction with age, P= | Interaction with race, P= | Interaction with sex, P= |
|--------|------------------------------------------------|-------------------------------------------------|--------------------------|---------------------------|--------------------------|
| Cer-16 | 0.547                                          | 0.760                                           | 0.207                    | 0.324                     | 0.353                    |
| Cer-18 | 0.207                                          | 0.153                                           | 0.083                    | 0.610                     | 0.092                    |
| SM-16  | 0.349                                          | 0.205                                           | 0.291                    | 0.537                     | 0.331                    |
| SM-18  | 0.641                                          | 0.130                                           | 0.115                    | 0.944                     | 0.039                    |

**Table S9. Interaction of select sphingolipids with smoking, age, race, and sex for association with odds of COPD**

|        | Interaction with smoking (former vs never), P= | Interaction with smoking (current vs never), P= | Interaction with age, P= | Interaction with race, P= | Interaction with sex, P= |
|--------|------------------------------------------------|-------------------------------------------------|--------------------------|---------------------------|--------------------------|
| Cer-14 | 0.174                                          | 0.224                                           | 0.438                    | 0.649                     | 0.013                    |
| Cer-18 | 0.975                                          | 0.191                                           | 0.386                    | 0.727                     | 0.476                    |
| SM-14  | 0.959                                          | 0.459                                           | 0.405                    | 0.188                     | 0.479                    |
| SM-16  | 0.203                                          | 0.041                                           | 0.253                    | 0.311                     | 0.824                    |
| SM-18  | 0.585                                          | 0.717                                           | 0.822                    | 0.164                     | 0.692                    |

## Supplemental Figures

**Figure S1. Correlation matrix for various sphingolipid species**

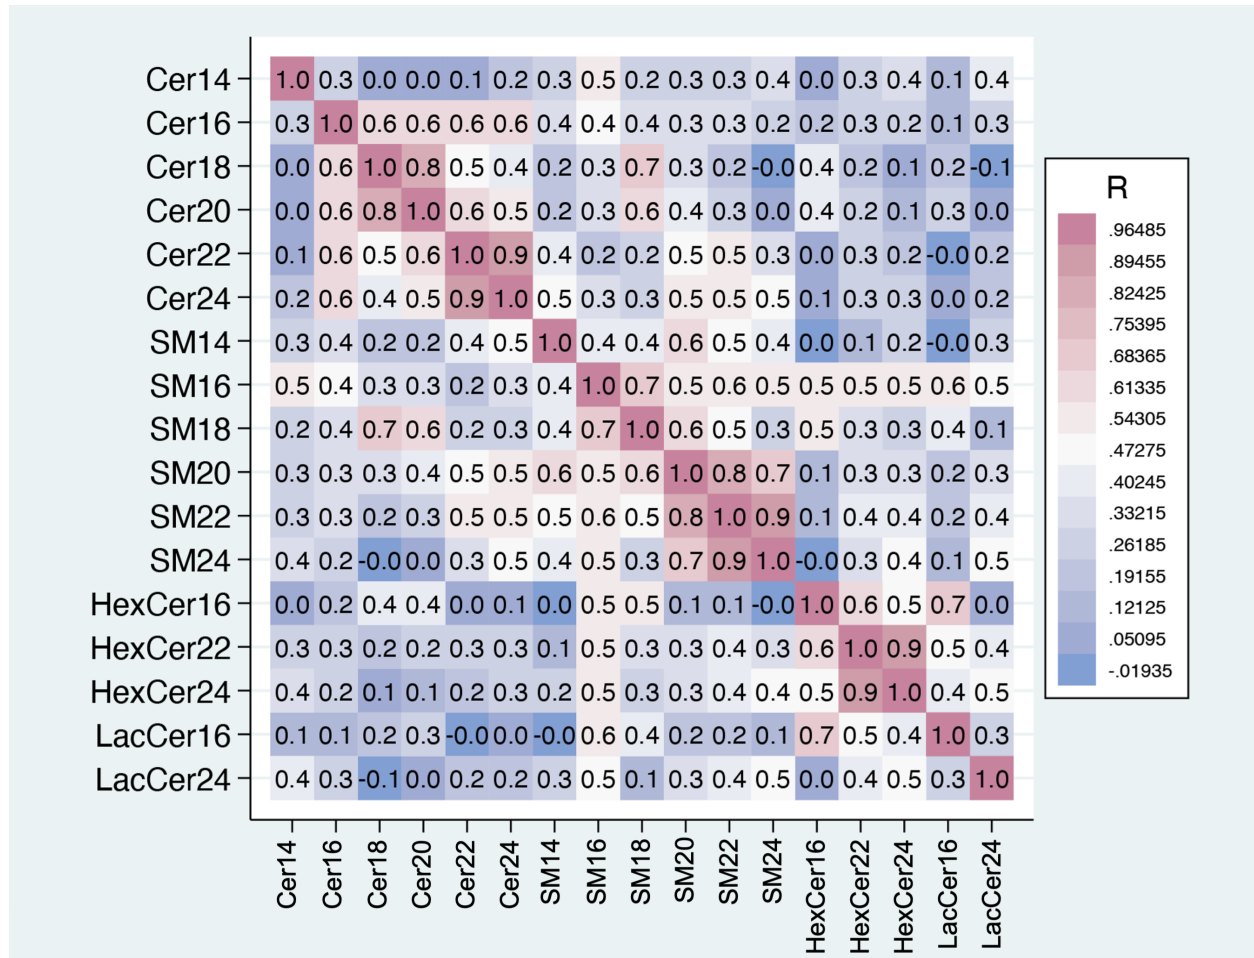

Supplement: 00346-2022.supplement.pdf [file 00346-2022.supplement.pdf]
